# Supplementary material for: Carbon nanotube-embedded hollow carbon nanofibers as efficient hosts for advanced lithium–sulfur batteries
Source: Royal Society of Chemistry journal article supplement (doi:10.1039/d3dt00288h), 2023-01-01
Supplement: d3dt00288h1.pdf [file d3dt00288h1.pdf]

## Supporting Information

### **Carbon nanotubes-embedded hollow carbon nanofibers as efficient host for advanced lithium-sulfur batteries**

Chenshan Lv, a Hailiang Cao, \*a Wei Deng, b Min Zhao,a Yanqin Miao,\*a Chunli Guo, a Peizhi Liua and Yucheng Wu\*ac

<sup>a</sup> *Key Laboratory of Interface Science and Engineering in Advanced Materials, Ministry of Education, Taiyuan University of Technology, Taiyuan, 030024, China.*

<sup>b</sup> *Ningbo Institute of Industrial Technology, Chinese Academy of Sciences, Ningbo, 315201, China.*

<sup>c</sup> *School of Materials Science and Engineering, Hefei University of Technology, Hefei, 230009, China.*

E-mail: caohailiang@tyut.edu.cn; miaoyanqin@tyut.edu.cn; ycwu@hfut.edu.cn.

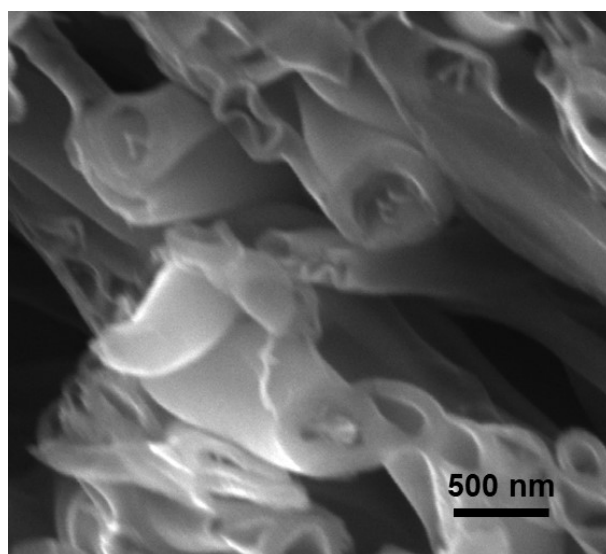

**Fig. S1** SEM image of HCNF/CNT.

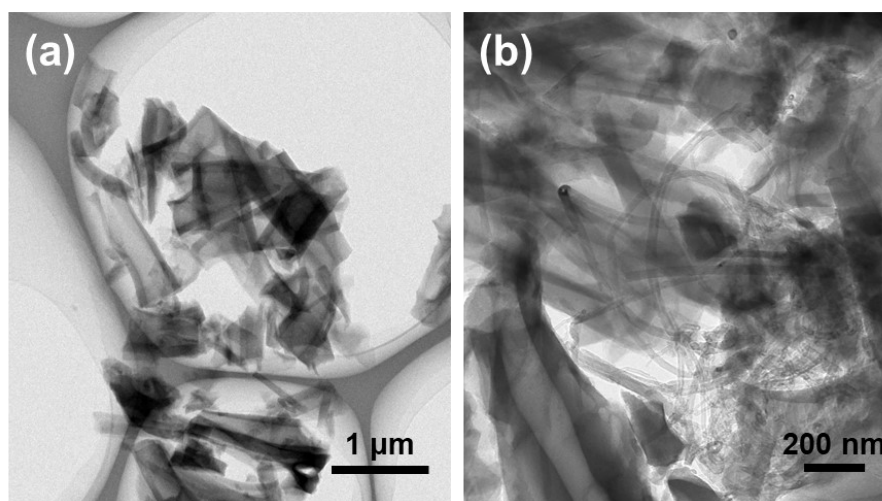

**Fig. S2** TEM images of HCNF (a) and HCNF/CNT (b).

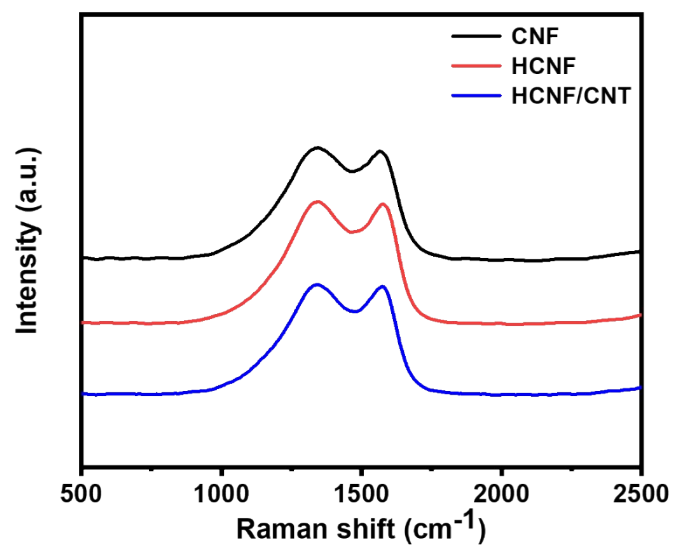

**Fig. S3** Raman spectra of CNF, HCNF and HCNF/CNT.

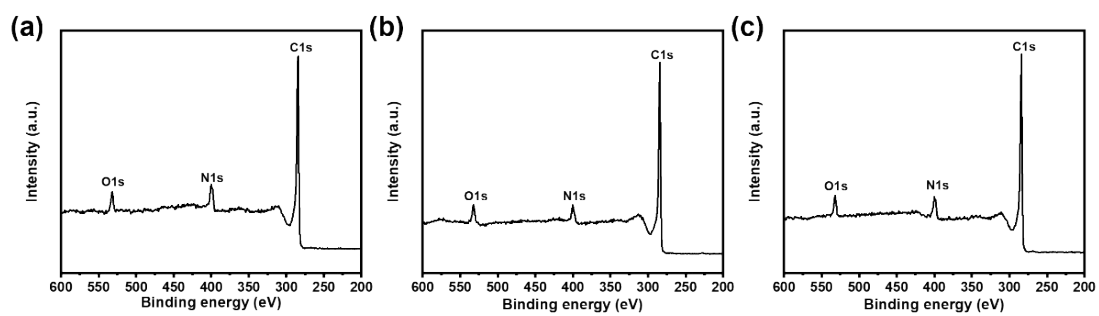

**Fig. S4** XPS spectra of CNF (a), HCNF (b) and HCNF/CNT (c).

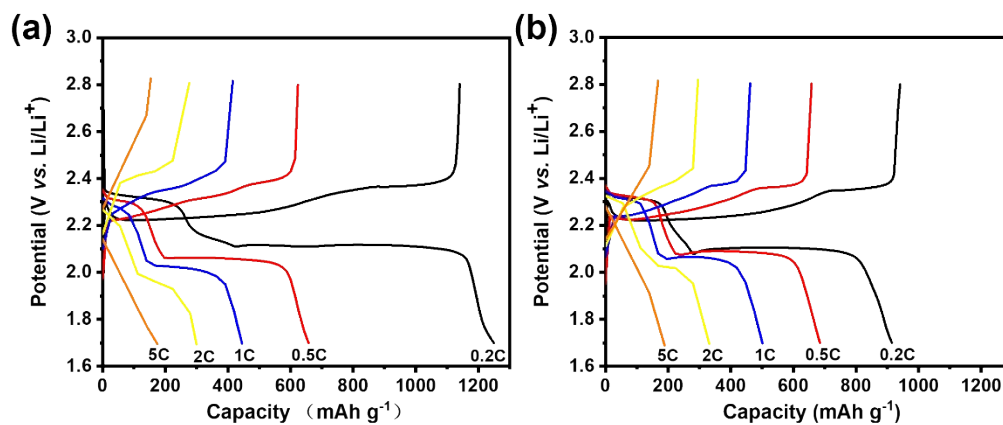

**Fig. S5** Galvanostatic discharge-charge profiles at various current rates of CNF-S (a) and of HCNF-S (b).

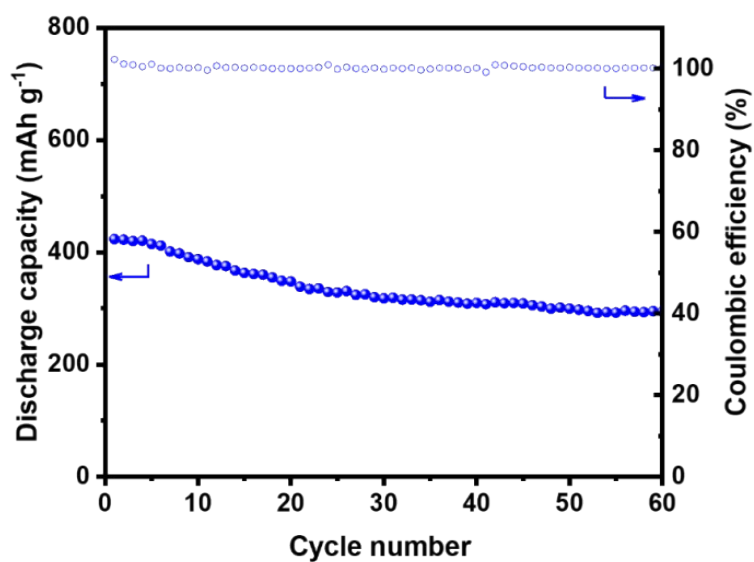

**Fig. S6** Cycling performance of HCNF/CNT-S with sulfur loading of 3 mg cm<sup>-2</sup> at 1C.

**Table S1** The cycling performance of carbon and sulfur compound materials reported in the literature is compared with this work.

| <b>Materials</b>                                            | <b>Sulfur content (wt%)</b> | <b>Current density</b> | <b>Cycle times</b> | <b>Cycle performance (mA h g<sup>-1</sup>)</b> |
|-------------------------------------------------------------|-----------------------------|------------------------|--------------------|------------------------------------------------|
| PC@RGO/S[1]                                                 | 71.2                        | 0.2 A g <sup>-1</sup>  | 100                | 543                                            |
| CFS@graphene[2]                                             | 33                          | 0.2 A                  | 50                 | 611                                            |
| N-doped CNT@<br>highly porous<br>carbon /S[3]               | 57.5                        | 0.2 C                  | 250                | 613                                            |
| phosphorus codoped<br>hierarchically<br>porous carbon /S[4] | 73                          | 1 C                    | 200                | 575                                            |
| AC-RH/S <sub>I</sub> [5]                                    | 80                          | 0.2 C                  | 100                | 679                                            |
| SiCN-S[6]                                                   | 66                          | 0.2 C                  | 40                 | 310                                            |
| carbon aerogel<br>/GNs0.1-S[7]                              | 58.86                       | 0.1 C                  | 100                | 471                                            |
| HCNF/CNT-S (This<br>work)                                   | 67.8                        | 0.2 C                  | 100                | 679                                            |
|                                                             |                             | 2 C                    | 200                | 522                                            |

## References

- [1] N. Wang, J. Wang, J. Zhao, J. Wang, J. Pan, J. Huang, Synthesis of porous-carbon@reduced graphene oxide with superior electrochemical behaviors for lithium-sulfur batteries, *J. Alloys Compd.* 851 (2021) 156832–156841. <https://doi.org/10.1016/j.jallcom.2020.156832>.
- [2] Z.Z. Yang, H.Y. Wang, X. Bin Zhong, W. Qi, B.Y. Wang, Q.C. Jiang, Assembling sulfur spheres on carbon fiber with graphene coated hybrid bulk electrodes for lithium sulfur batteries, *RSC Adv.* 4 (2014) 50964–50968. <https://doi.org/10.1039/c4ra09763g>.
- [3] T. Long, F. Meng, B. Xu, Y. Zhao, W. Liu, X. Wei, L. Zheng, J. Liu, Nitrogen-doped carbon nanotubes intertwined with porous carbon with enhanced cathode performance in lithium-sulfur batteries, *Sustain. Energy Fuels.* 4 (2020) 3926–3933. <https://doi.org/10.1039/d0se00583e>.
- [4] W. Ai, W. Zhou, Z. Du, Y. Chen, Z. Sun, C. Wu, C. Zou, C. Li, W. Huang, T. Yu, Nitrogen and phosphorus codoped hierarchically porous carbon as an efficient sulfur host for Li-S batteries, *Energy Storage Mater.* 6 (2017) 112–118. <https://doi.org/10.1016/j.ensm.2016.10.008>.
- [5] D.L. Vu, J.S. Seo, H.Y. Lee, J.W. Lee, Activated carbon with hierarchical micro-mesoporous structure obtained from rice husk and its application for lithium-sulfur batteries, *RSC Adv.* 7 (2017) 4144–4151. <https://doi.org/10.1039/C6RA26179E>.
- [6] F. Qu, M. Graczyk-Zajac, D. Vrankovic, N. Chai, Z. Yu, R. Riedel, Effect of morphology of C-rich silicon carbonitride ceramic on electrochemical properties of sulfur cathode for Li-S battery, *Electrochim. Acta.* 384 (2021) 138265. <https://doi.org/10.1016/j.electacta.2021.138265>.
- [7] Y. Yan, M. Shi, Y. Zou, Y. Wei, L. Chen, C. Fan, R. Yang, Y. Xu, Tunable hierarchical porous carbon aerogel / graphene composites cathode matrix for Li-S batteries, *J. Alloys Compd.* 791 (2019) 952–961.

<https://doi.org/10.1016/j.jallcom.2019.03.396>.
